# Supplementary material for: TLR8 signaling enhances tumor immunity by preventing tumor-induced T-cell senescence
Source: PubMed Central journal article supplement (PMC4287933; doi:10.15252/emmm.201403918), 2014-09-17
Supplement: emmm0006-1294-sd2.pdf [file emmm0006-1294-sd2.pdf]

## TLR8 signaling enhances tumor immunity by preventing tumor-induced T cell senescence

Jian Ye, Chunling Ma, Eddy C. Hsueh, Jie Dou, Wei Mo, Shuai Liu, Bing Han, Yi Huang, Yanping Zhang, Mark A. Varvares, Daniel F. Hoft and Guangyong Peng

*Corresponding author: Guangyong Peng, Saint Louis University*

---

### Review timeline:

Submission date:

29 January 2014

Accepted:

13 August 2014

---

*Editor: Céline Carret*

### Transaction Report:

No Peer Review Process File is available with this article, as the authors have chosen not to make the review process public in this case.
